# Supplementary material for: Basal extrusion of single‐oncogenic mutant cells induces dome‐like structures with altered microenvironments
Source: PubMed Central journal article supplement — Cancer Sci. 2022 Aug 30;113(11):3710–21. doi: 10.1111/cas.15483 (PMC9633292; doi:10.1111/cas.15483), 2022-08-30
Supplement: CAS-113-3710-s001.pdf [file CAS-113-3710-s001.pdf]

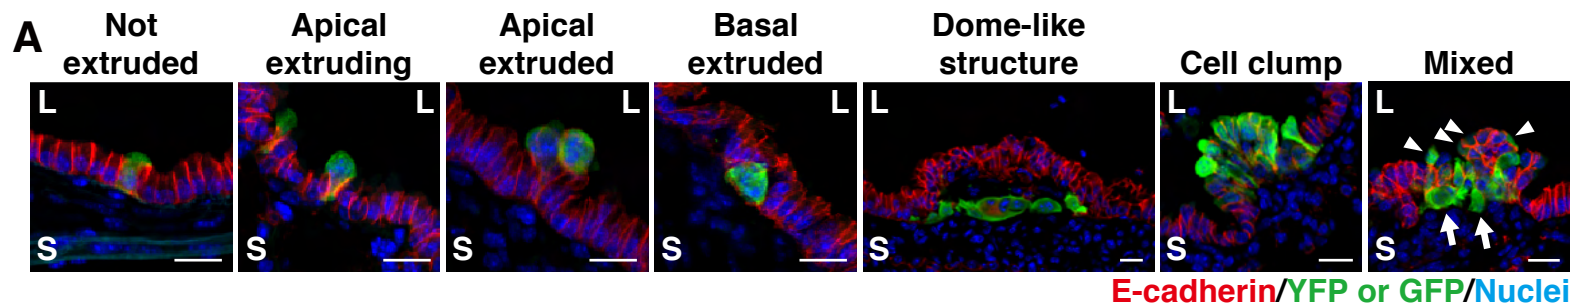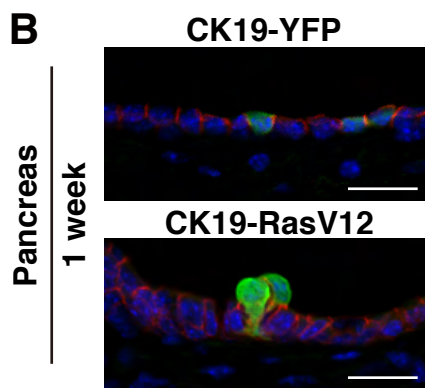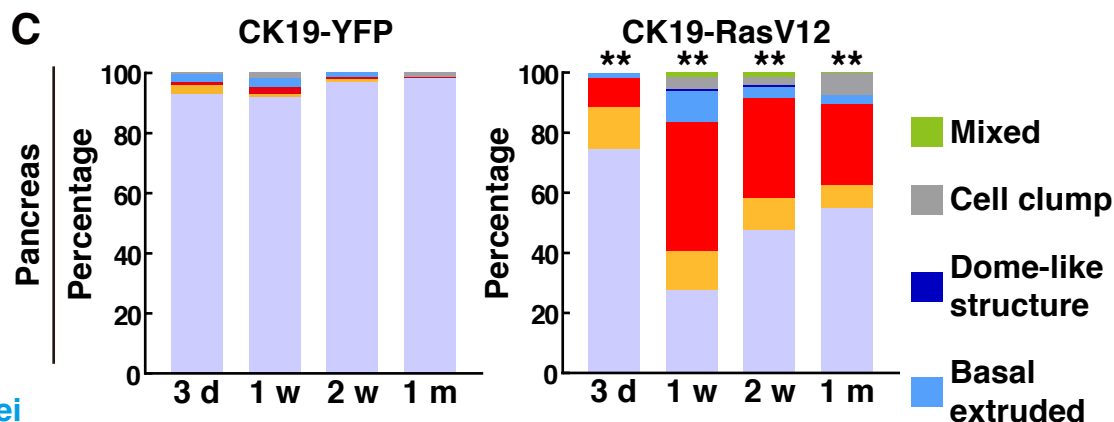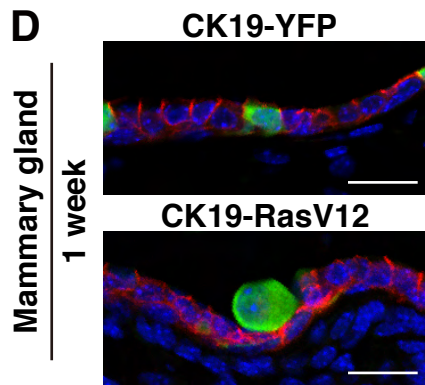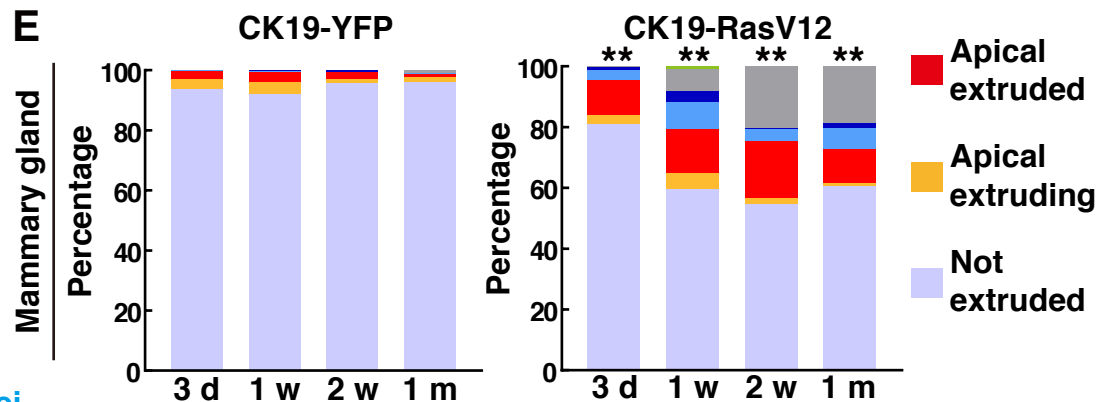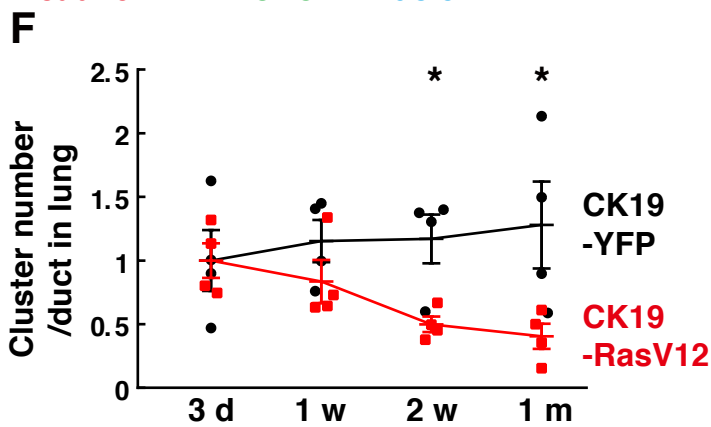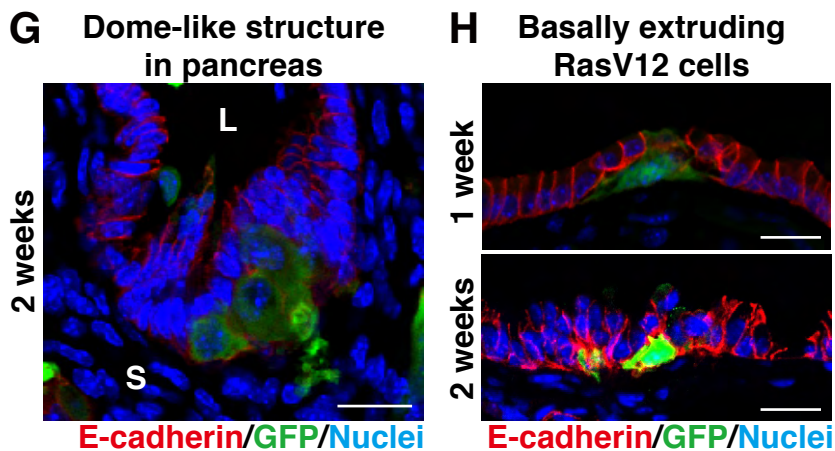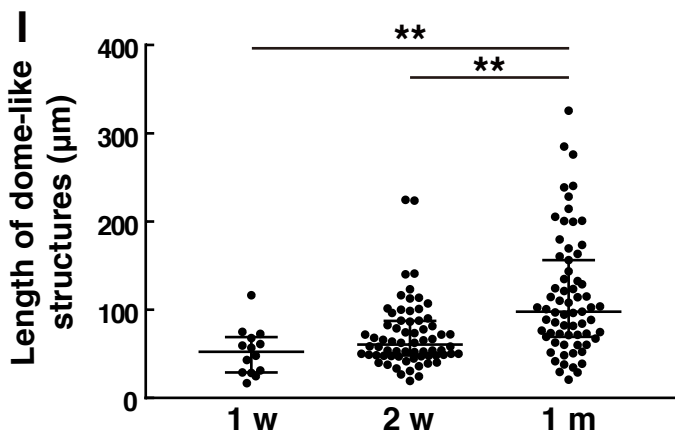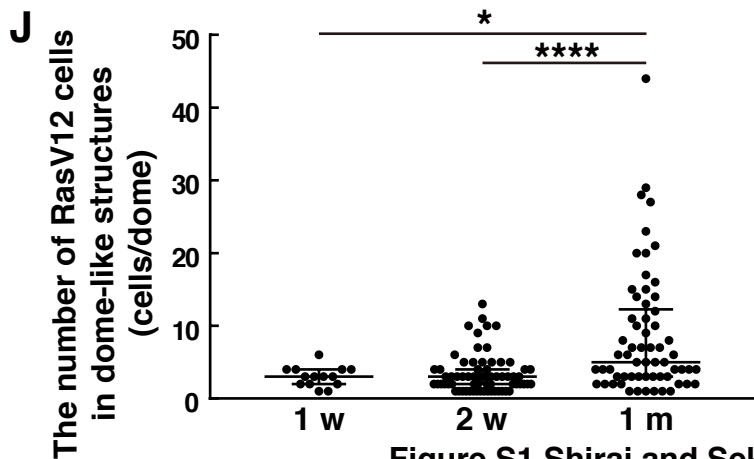

Figure S1 Shirai and Sekai et al.

**Figure S1** The fate of RasV12-transformed cells in the lung, pancreas and mammary gland. (A) Classification of the phenotypes of YFP- or RasV12-expressing cells. Single or clustered cells are classified into seven phenotypes. ‘Not extruded’: less than 6 cells (in a cluster) remaining within the epithelium. ‘Apical extruding’: more than 20% of cells (in a cluster) with their nuclei apically shifted, but still attached to the basement membrane. ‘Apical extruded’: more than 20% of cells completely detached from the basement membrane and translocated into the apical lumen. ‘Basal extruded’: more than 20% of cells basally delaminated beneath the basement membrane. ‘Dome-like structure’: more than 50% of cells basally delaminated with a bumped, overlying epithelial layer. ‘Cell clump’: a group of more than 5 cells remaining within epithelia (not including apically or basally extruded cells). ‘Mixed’: a cluster containing both apically extruded (arrowheads) and basally extruded (arrows) cells. L or S indicates a luminal or stromal region, respectively. Scale bars, 20  $\mu\text{m}$ . (B, D) Immunofluorescence images of the pancreas (B) and mammary gland (D) from CK19-YFP or CK19-RasV12 mice with tamoxifen treatment. Scale bars, 20  $\mu\text{m}$ . (C, E) Quantification of the phenotypes of YFP or RasV12 cells in the pancreas (C) and mammary gland (E). (C)  $n = 301$  (3 d), 307 (1 w), 298 (2 w), and 298 (1 m) clusters in CK19-YFP.  $n = 307$  (3 d), 315 (1 w), 241 (2 w), and 294 (1 m) clusters in CK19-RasV12. Data are from three mice. (E)  $n = 401$  (3 d), 318 (1 w), 368 (2 w), and 403 (1 m) clusters in CK19-YFP.  $n = 408$  (3 d), 261 (1 w), 421 (2 w), and 260 (1 m) clusters in CK19-RasV12. Data are from three (1 w in CK19-YFP; 1 w and 1 m in CK19-RasV12) or four (3 d, 2 w, and 1 m in CK19-YFP; 3 d and 2 w in CK19-RasV12) mice. Note that the distribution of the phenotypes is compatible between mice.  $**P < 0.01$ , chi-square test. (F) Quantification of the number of YFP (black line) or RasV12 (red line) clusters in a bronchial epithelial duct from CK19-YFP or

CK19-RasV12 mice with tamoxifen treatment. Data are mean  $\pm$  s.e.m.  $n = 335$  (3 d), 334 (1 w), 315 (2 w), and 322 (1 m) ducts for CK19-YFP.  $n = 343$  (3 d), 339 (1 w), 367 (2 w), and 352 (1 m) ducts for CK19-RasV12. The number of YFP or RasV12 cell clusters in three sequential 50- $\mu$ m-thick sections was quantified and shown as ‘Cluster number/duct in lung’. Data are from four mice for each group.  $*P < 0.05$ , unpaired two-tailed Student’s t test. (G) Immunofluorescence image of a dome-like structure in the pancreatic duct from CK19-RasV12 mice with tamoxifen treatment. L or S indicates a luminal or stromal region, respectively. Scale bar, 20  $\mu$ m. (H) Immunofluorescence images of basally extruding RasV12 cells from the bronchial epithelium. Scale bars, 20  $\mu$ m. (I, J) Quantification of the length of dome-like structures (I) or the number of RasV12 cells within dome-like structures (J). For quantification of the length of dome-like structures, we measured the length of a straight line linking both bottom ends of the bump of epithelia. Data are median  $\pm$  quartiles. (I)  $n = 14$  (1 w), 68 (2 w), and 67 (1 m) dome-like structures from three mice. (J)  $n = 14$  (1 w), 67 (2 w), and 62 (1 m) dome-like structures from three mice.  $*P < 0.05$ ,  $**P < 0.01$ ,  $****P < 0.001$ , Kruskal-Wallis test followed by Dunn’s multiple comparison test.

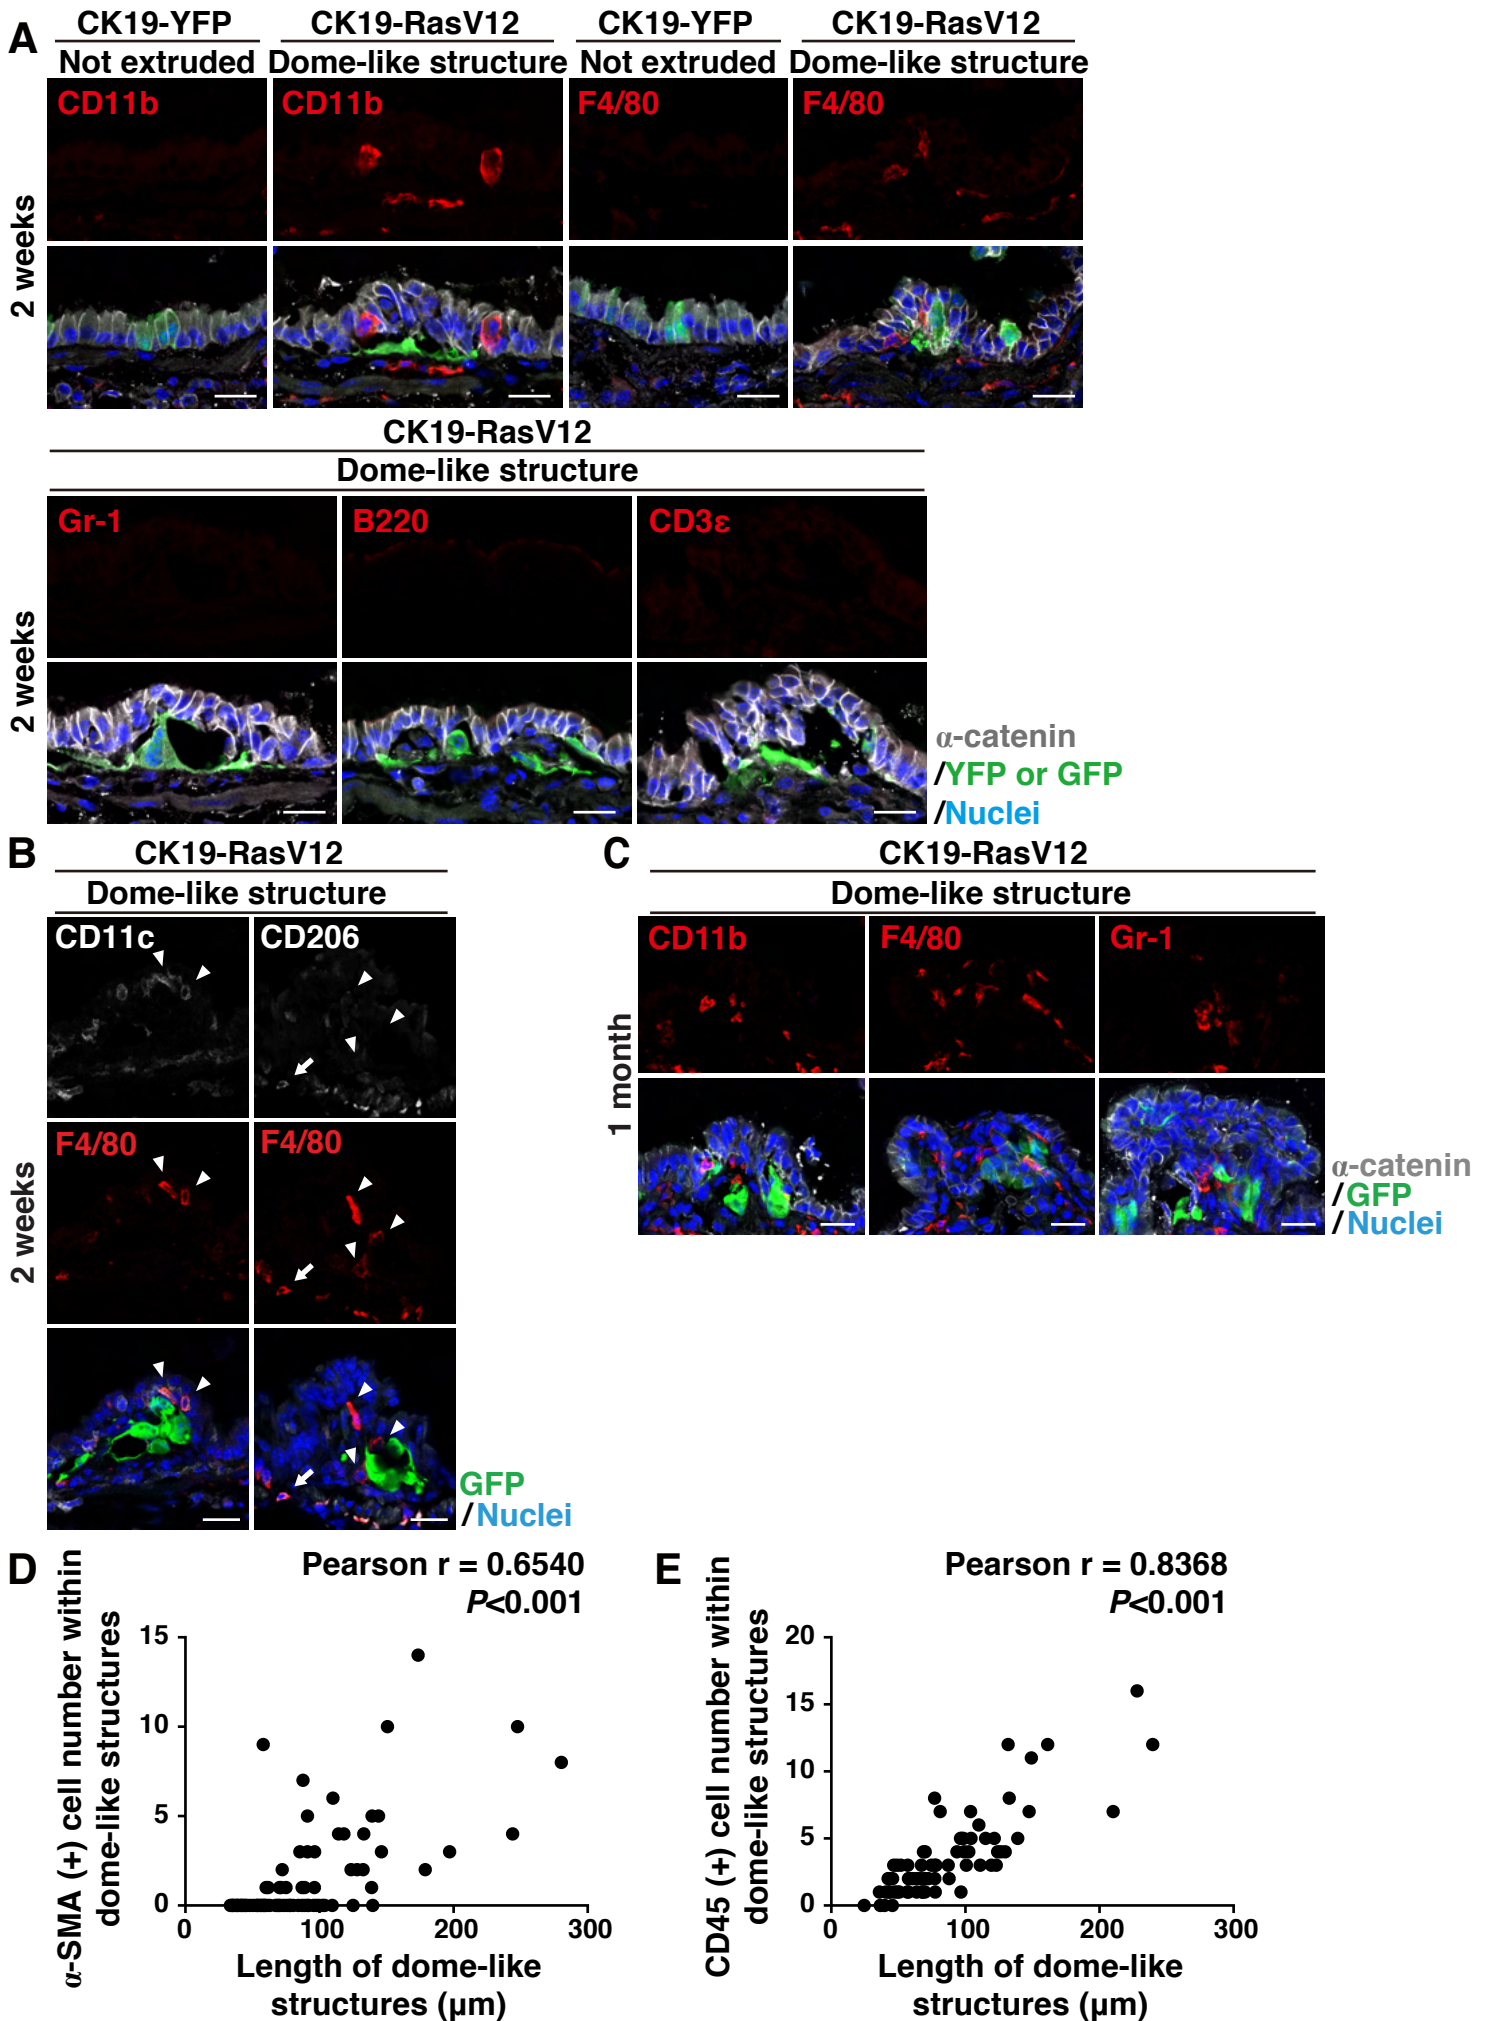

Figure S2 Shirai and Sekai et al.

**Figure S2** Accumulation of immune cells in dome-like structures. (A-C)

Immunofluorescence images of bronchial epithelia from CK19-YFP or CK19-RasV12 mice after tamoxifen injection. The following antibodies recognize a marker protein on specific immune cells: CD11b (macrophages and neutrophils), F4/80 (macrophages), Gr-1 (neutrophils), B220 (B lymphocytes), CD3 $\epsilon$  (T lymphocytes), CD11c (M1 pro-inflammatory macrophages), and CD206 (M2 anti-inflammatory macrophages). (B) Arrowheads indicate F4/80-positive, CD11c-positive, CD206-negative macrophages in the dome-like structures that are supposed to be recruited from bloodstream or tissue-resident interstitial macrophages. Arrows indicate an F4/80-positive, CD206-positive tissue-resident alveolar macrophage outside the dome-like structure. Scale bars, 20  $\mu$ m. (D, E) Correlations between the length of dome-like structures and the number of  $\alpha$ -SMA<sup>+</sup> fibroblasts (D) or CD45<sup>+</sup> immune cells (E) within dome-like structures.  $n = 107$  (D) and 82 (E) dome-like structures from four (D) or three (E) mice. Pearson correlation analysis.  $P < 0.05$  was considered significant.

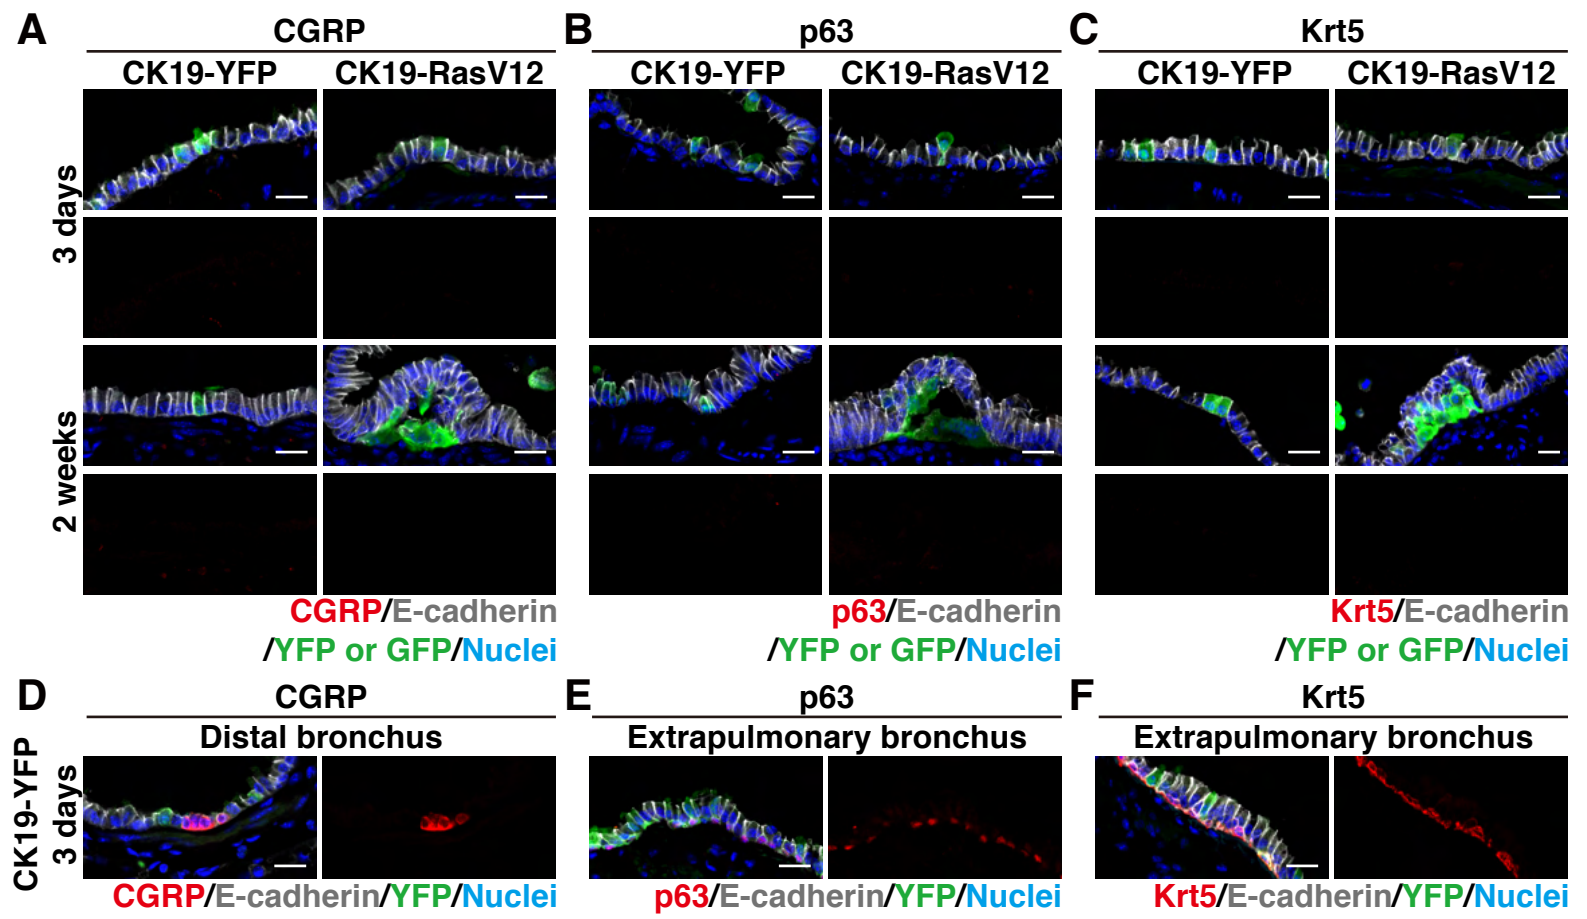

Figure S3 Shirai and Sekai et al.

**Figure S3** CK19 promoter-driven expressions in neuroendocrine or basal cells of bronchial epithelia. (A-F) Immunofluorescence images of distal bronchial epithelia (A-D) or extrapulmonary bronchial epithelia (E, F) from CK19-YFP or CK19-RasV12 mice with tamoxifen treatment. The following antibodies recognize a differentiation marker of specialized lung cells: CGRP (neuroendocrine cells), p63, or Krt5 (basal cells). (D-F) Validation of the antibodies for immunofluorescence. Note that basal cells are present in extrapulmonary bronchial epithelia, but not in distal bronchial epithelia where dome-like structures were analyzed in this study. Scale bars, 20  $\mu\text{m}$ .

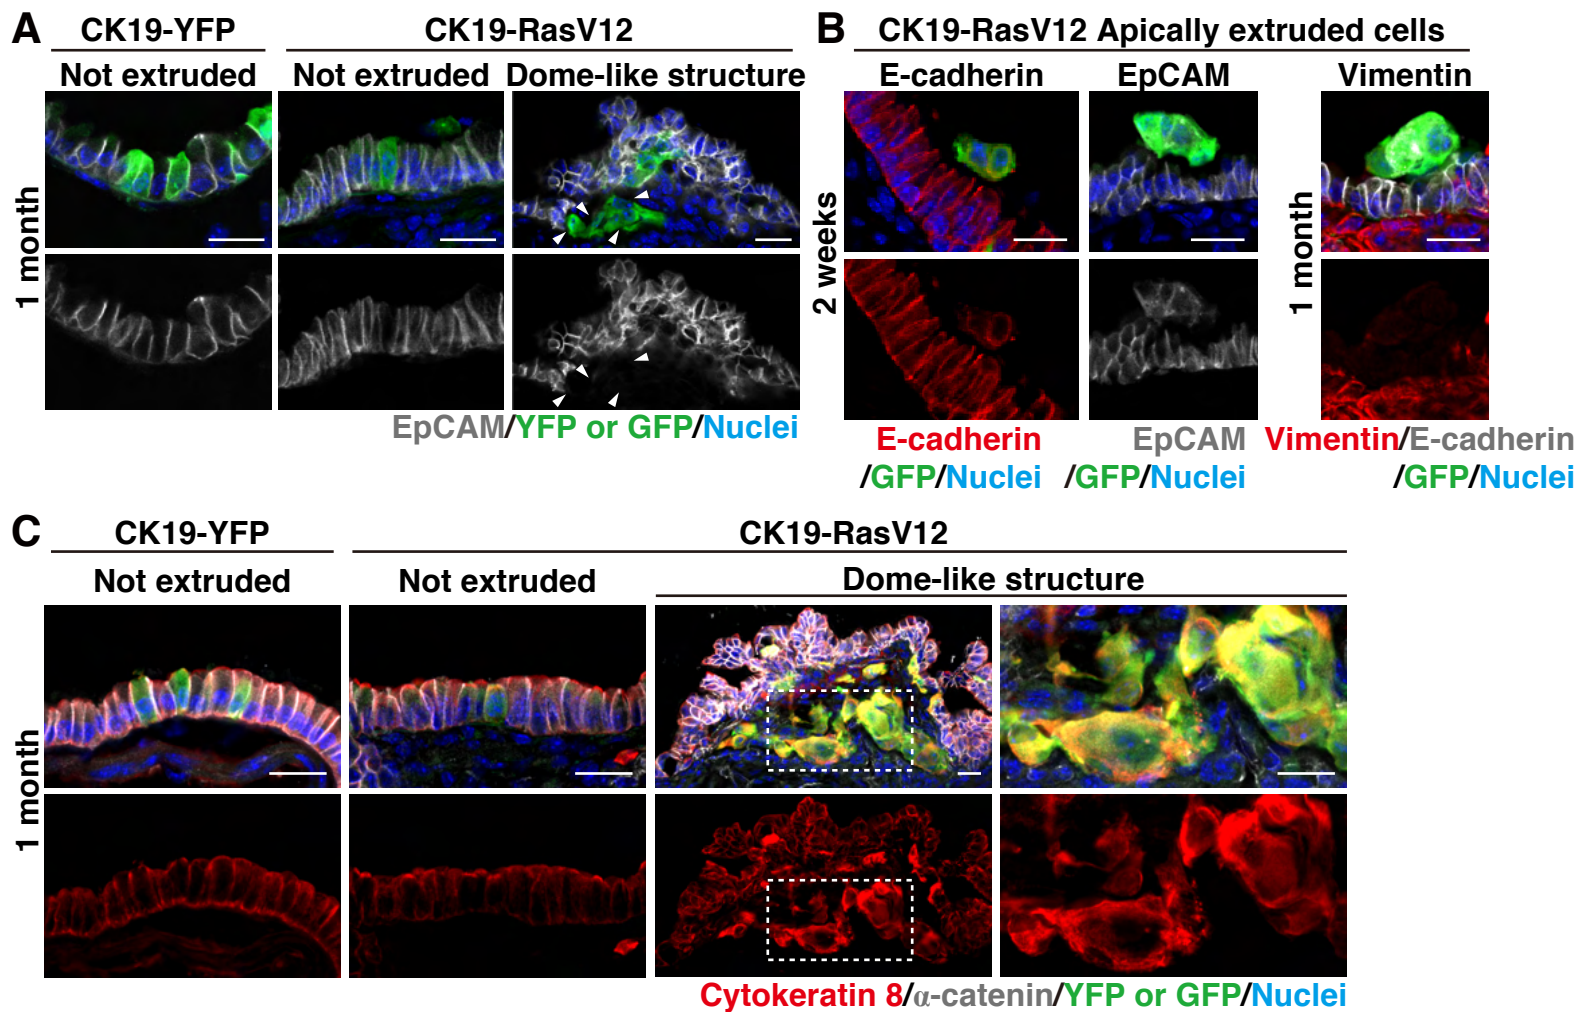

Figure S4 Shirai and Sekai et al.



**Figure S4** Partial EMT phenotype in basally extruded RasV12-transformed cells in bronchial epithelia. (A-C) Immunofluorescence images of bronchial epithelia from CK19-YFP or CK19-RasV12 mice with tamoxifen treatment. Scale bars, 20  $\mu\text{m}$ . The arrowheads indicate EpCAM<sup>-</sup> GFP<sup>+</sup> RasV12 cells in the dome-like structure (A). The dotted areas are shown at higher magnification in the right panels (C).

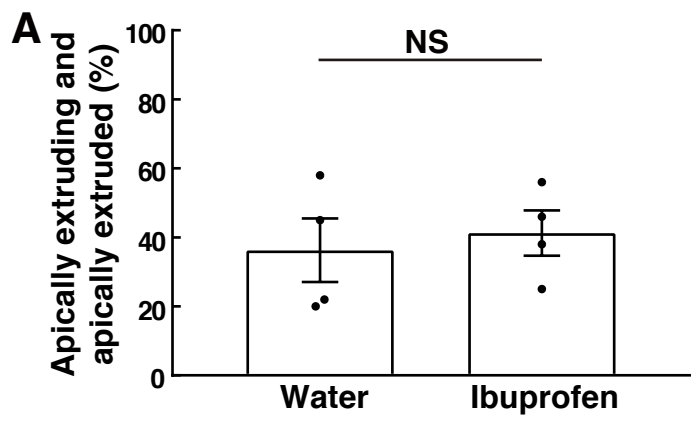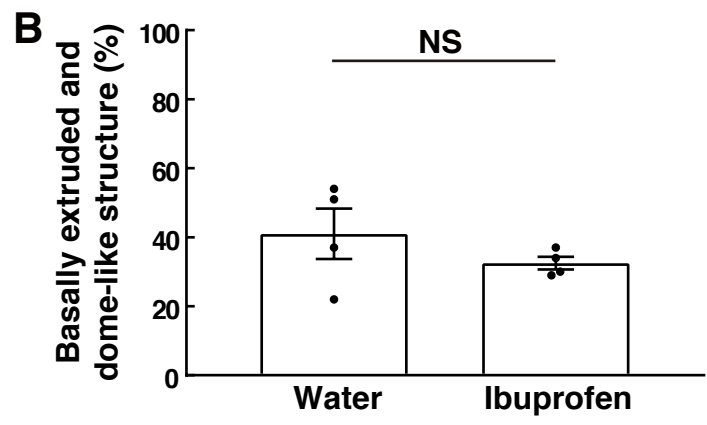

**Figure S5** The effect of ibuprofen treatment on the phenotypes of RasV12 cells. (A, B) Quantification of the effect of ibuprofen on the phenotypes of RasV12 cells: apically extruding/extruded (A) or basally extruded/dome-like structures (B). Ibuprofen was administered as shown in Figure 5C. Data are mean  $\pm$  s.e.m.  $n = 433$  (water) and 403 (ibuprofen) cells from four mice. NS, not significant, unpaired two-tailed Student's  $t$  test.

Primers used for genotyping

| Genotyping primer                                   | 5' to 3' sequence     |
|-----------------------------------------------------|-----------------------|
| DNMT1-CAG-loxP-STOP-loxP-HRasV12-IRES-eGFP, forward | CACTGTGGAATCTCGGCAGG  |
| DNMT1-CAG-loxP-STOP-loxP-HRasV12-IRES-eGFP, reverse | GCAATATGGTGGAAAATAAC  |
| Rosa26-loxP-STOP-loxP-EYFP, forward                 | AAAGTCGCTCTGAGTTGTTAT |
| Rosa26-loxP-STOP-loxP-EYFP, WT reverse              | GGAGCGGGAGAAATGGATATG |
| Rosa26-loxP-STOP-loxP-EYFP, mutant reverse          | GCGAAGAGTTTGTCTCAACC  |
| Scgb1a1-CreERT, forward                             | ACTCACTATTGGGGGTGTGG  |
| Scgb1a1-CreERT, WT reverse                          | AGGCTCCTGGCTGGAATAGT  |
| Scgb1a1-CreERT, mutant reverse                      | CCAAAAGACGGCAATATGGT  |
